# Supplementary material for: Comparative Transcriptomics Reveals Clues for Differences in Pathogenicity between Hysterothylacium aduncum, Anisakis simplex sensu stricto and Anisakis pegreffii
Source: MDPI journal article supplement (doi:10.3390/genes11030321), 2020-03-18

| List of primers used for validation of transcripts obtained by the Rna-seq analyses. |                       |                   |                |
|--------------------------------------------------------------------------------------|-----------------------|-------------------|----------------|
| Primer Name                                                                          | Sequence              | Parasitic species | Type of gene   |
| EFB/F                                                                                | CCATGGGATGATACGGGTGCA | AP and AS         | Constitutive   |
| EFB/R                                                                                | ATGATACCGAACGCCACTGG  | AP and AS         | Constitutive   |
| HA40SF                                                                               | GTCGGTCGCTGTGATGGTTA  | HA                | Constitutive   |
| HA40SR                                                                               | ACATCGCCCCCTTCATATGCA | HA                | Constitutive   |
| CRS/F                                                                                | CTCGATTGGGATGTGCCCTT  | AS                | PX_upregulated |
| CRS/R                                                                                | TTACCCGGTTGCTCGTATCG  | AS                | PX_upregulated |
| SHKF                                                                                 | AGGTGGTCAATTGCATCGGT  | AS                | PX_upregulated |
| SHKR                                                                                 | TGCCGGTTAGTTCAGCACAT  | AS                | PX_upregulated |
| CRP/F                                                                                | TGGGTCGCCAACTTCGTAAA  | AP                | PX_upregulated |
| CRP/R                                                                                | TGGGATGTGCCCTTAACACA  | AP                | PX_upregulated |
| AST_apF                                                                              | TCCCTTTGGCCATAATGCGT  | AP                | PX_upregulated |
| AST_apR                                                                              | GTCGTTGAAAGGTGCGTCAC  | AP                | PX_upregulated |
| CAPF                                                                                 | CCAGGCATTTTGATCCCGGA  | AP                | PX_upregulated |
| CAPR                                                                                 | CGATACGAGCAACCGGGTAA  | AP                | PX_upregulated |
| HA1Hsp90F                                                                            | GGTGGCAGTTTCAAACCGTC  | HA                | PX_upregulated |
| HA1Hsp90R                                                                            | GGCCTTCATGATACGCTCCA  | HA                | PX_upregulated |
| HA2Hsp90F                                                                            | GAAGGTGGCTGTTTCGAACC  | HA                | PX_upregulated |
| HA2Hsp90R                                                                            | TCCATGTTTCGCTGACCATCC | HA                | PX_upregulated |

Boxplot of relative quantification of selected transcripts for Real-Time validation, with indication of standard errors. Y axis: mean of ratio of nanograms of PX enriched genes on ng of reference gene; W axis: bars of pharynx (PX), the carcass (CARC) and the whole larvae (WL). HA in green: *Hysterothylacium aduncum*; AS in blue: *Anisakis simplex* sensu stricto; AP in orange: *Anisakis pegreffii*.

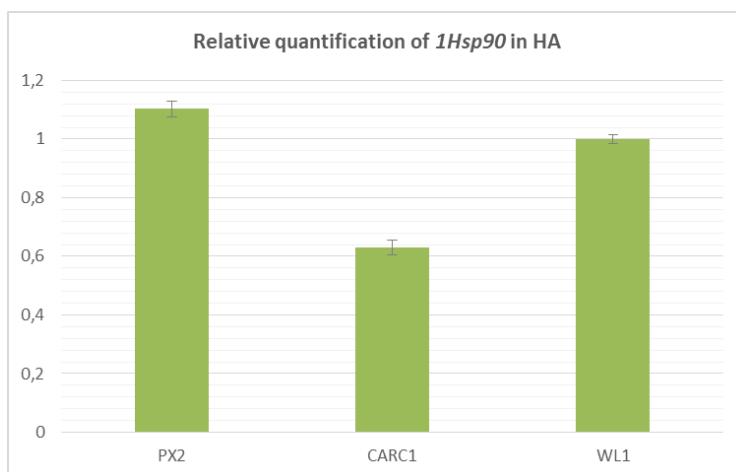

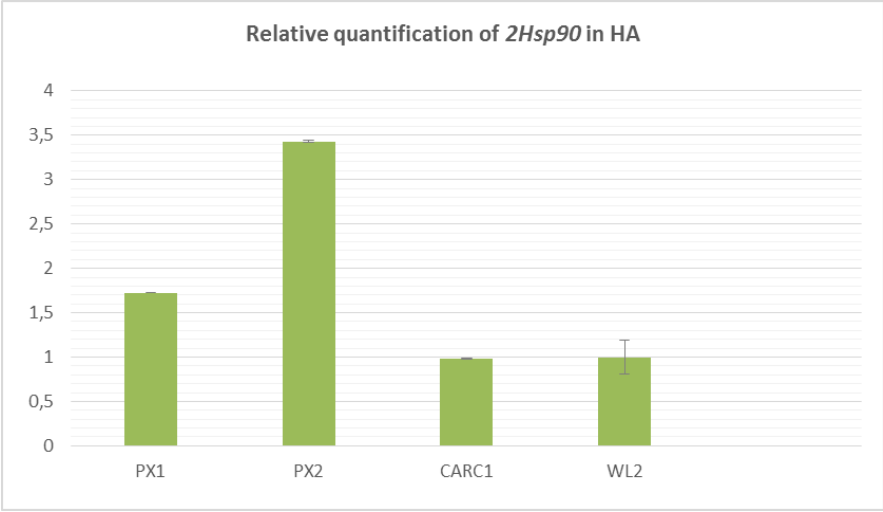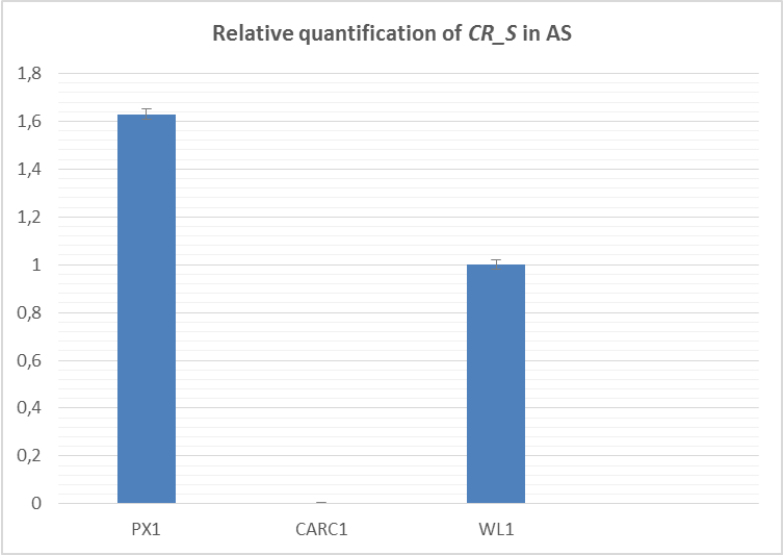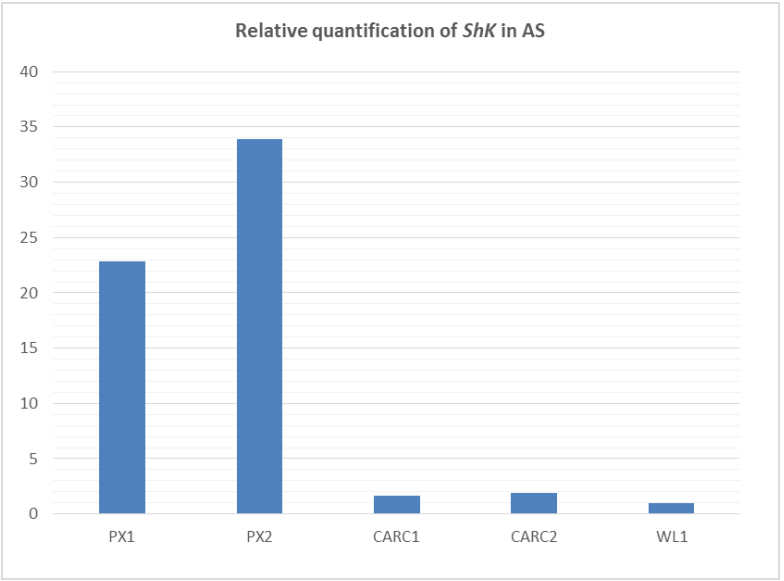

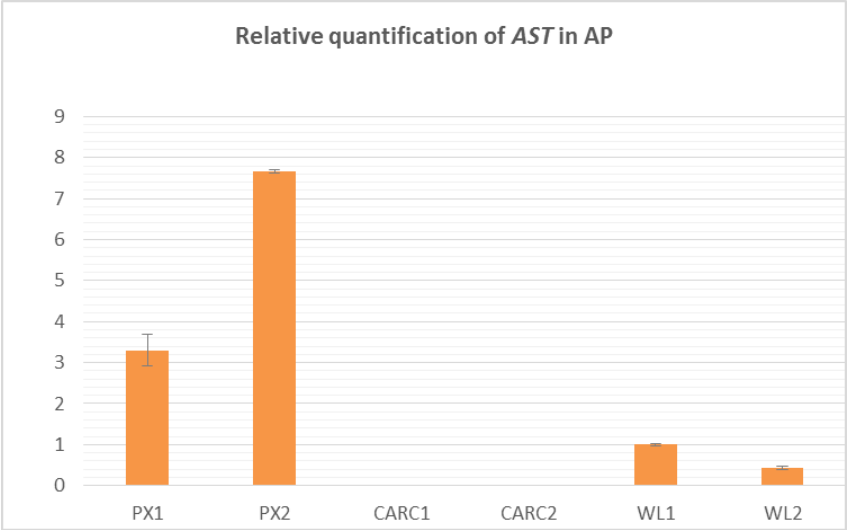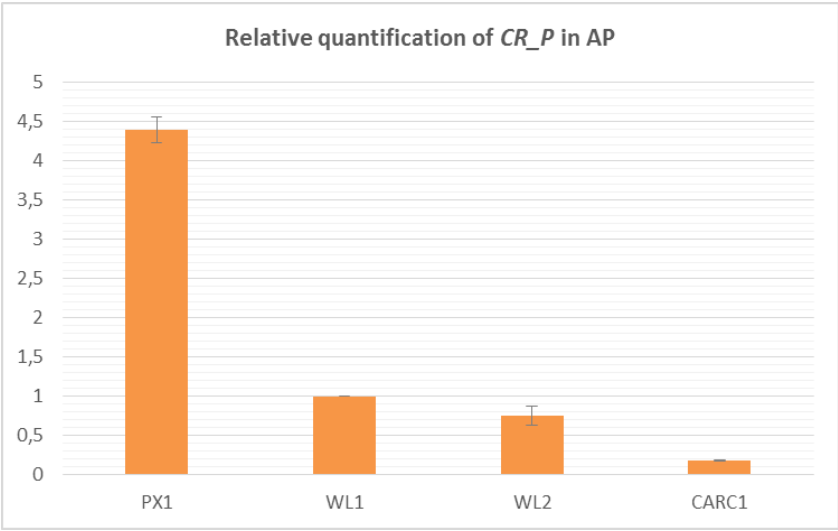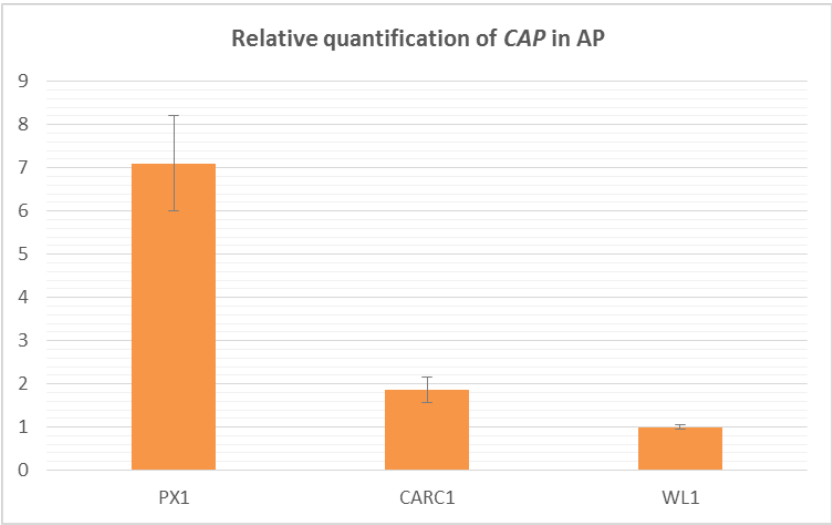

Supplement: s1 [file s1]
