# Supplementary figures and images for: Comparative Transcriptomics Reveals Clues for Differences in Pathogenicity between Hysterothylacium aduncum, Anisakis simplex sensu stricto and Anisakis pegreffii
Source: MDPI journal article supplement (doi:10.3390/genes11030321), 2020-03-18

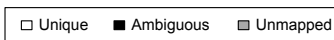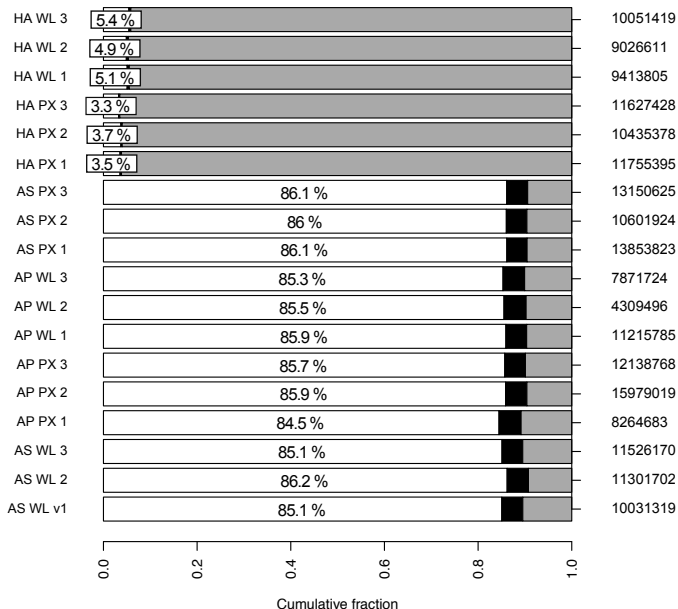

Supplement: s1 [file s1]
